# Supplementary material
Source: PubMed Central journal article supplement (PMC9434428)
Supplement: glab295_suppl_supplementary_material.pdf [file glab295_suppl_supplementary_material.pdf]

**Online only (supplementary) material**

**eTable 1.** Sensitivity and specificity of different temperature cutpoints for adults <65 years of age (top) and adults  $\geq 65$  years of age (bottom). Values in bold for 37.8°C (<65 years of age) and 37.4°C ( $\geq 65$  years of age).

**<65 years of age**

| <b>Cutpoint</b>                 | <b>Sensitivity</b> | <b>Specificity</b> |
|---------------------------------|--------------------|--------------------|
| ( $\geq 37.4$ )                 | 46.50%             | 98.58%             |
| ( $\geq 37.5$ )                 | 43.99%             | 99.84%             |
| ( $\geq 37.6$ )                 | 40.39%             | 100.00%            |
| ( $\geq 37.7$ )                 | 36.98%             | 100.00%            |
| <b>(<math>\geq 37.8</math>)</b> | <b>35.19%</b>      | <b>100.00%</b>     |
| ( $\geq 37.9$ )                 | 32.68%             | 100.00%            |
| ( $\geq 38$ )                   | 29.44%             | 100.00%            |
| ( $\geq 38.1$ )                 | 26.39%             | 100.00%            |

**$\geq 65$  years of age**

| <b>Cutpoint</b>                 | <b>Sensitivity</b> | <b>Specificity</b> |
|---------------------------------|--------------------|--------------------|
| ( $\geq 37.2$ )                 | 42.27%             | 96.91%             |
| ( $\geq 37.3$ )                 | 39.59%             | 98.01%             |
| <b>(<math>\geq 37.4</math>)</b> | <b>36.28%</b>      | <b>98.90%</b>      |
| ( $\geq 37.5$ )                 | 32.81%             | 99.78%             |
| ( $\geq 37.6$ )                 | 28.39%             | 100.00%            |
| ( $\geq 37.7$ )                 | 25.87%             | 100.00%            |
| ( $\geq 37.8$ )                 | 23.66%             | 100.00%            |

**eTable 2.** Area under the curve (AUC) for the receiver operating characteristic at different age thresholds.

| Age (years) | Number of participants | AUC (95% CI)       |
|-------------|------------------------|--------------------|
| ≥65         | 1087                   | 0.67 (0.65 – 0.70) |
| ≥75         | 510                    | 0.68 (0.64 – 0.73) |
| ≥85         | 178                    | 0.71 (0.57 – 0.79) |
